# Supplementary material for: A telluride shell on plasmonic Au nanoparticles: amorphous/crystalline phase and shape evolution engineering via aqueous cation exchange
Source: Royal Society of Chemistry journal article supplement (doi:10.1039/d1qm00239b), 2021-01-01
Supplement: d1qm00239b1.pdf [file d1qm00239b1.pdf]

**Supporting information:**

**Telluride Shell on Plasmonic Au Nanoparticles: Amorphous/Crystalline Phase and Shape Evolution Engineering via Aqueous Cation Exchange**

Mengyao Su,<sup>a</sup> Xinyuan Li,<sup>a</sup> Meng Xu,<sup>a</sup> Xiaodong Wan,<sup>a</sup> Hongzhi Wang,<sup>a</sup> Bing Bai,<sup>a</sup> Hongpan Rong,<sup>a</sup> Jiajia Liu,<sup>a</sup> Jia Liu<sup>a</sup> and Jiatao Zhang<sup>a\*</sup>

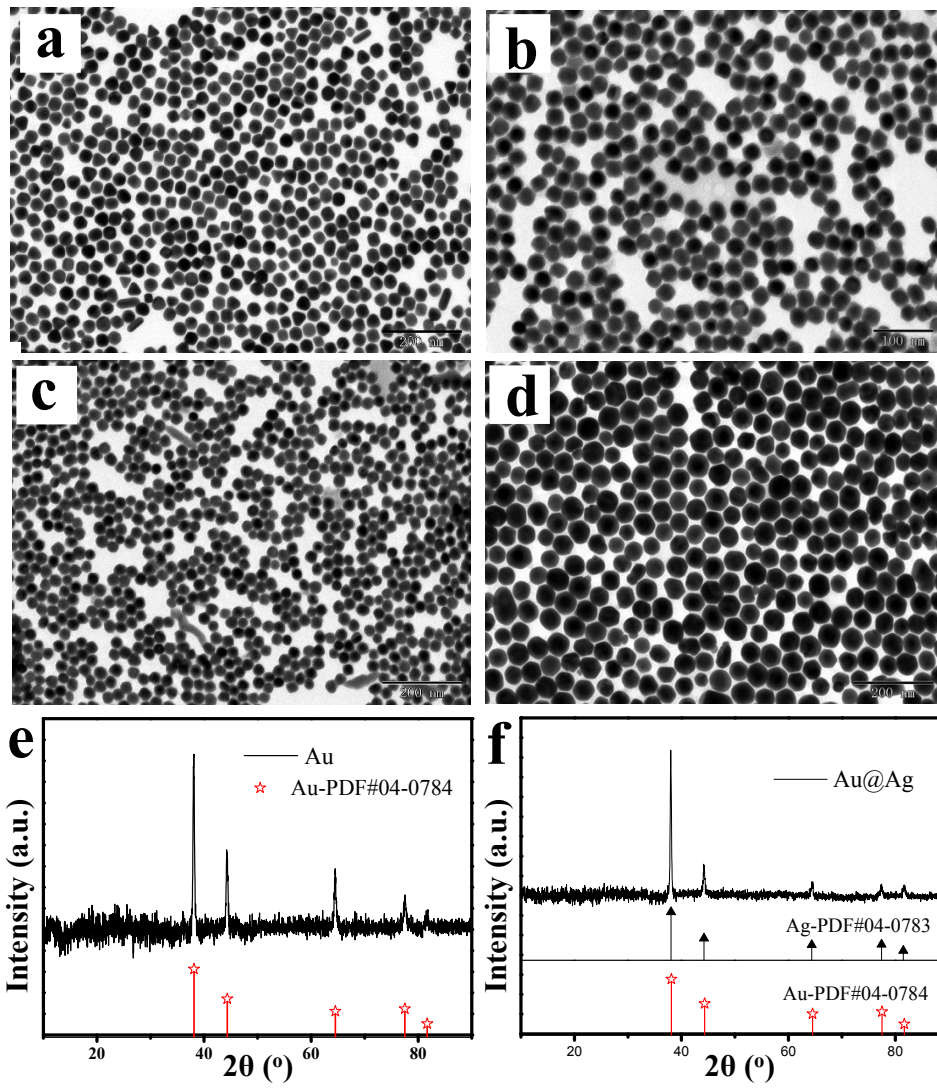

Fig. S1 TEM images of (a) Au NCs and (b) Au@Ag core-shell HNCs. X-ray diffraction patterns of (c) Au NCs and (d) Au@Ag core-shell HNCs.

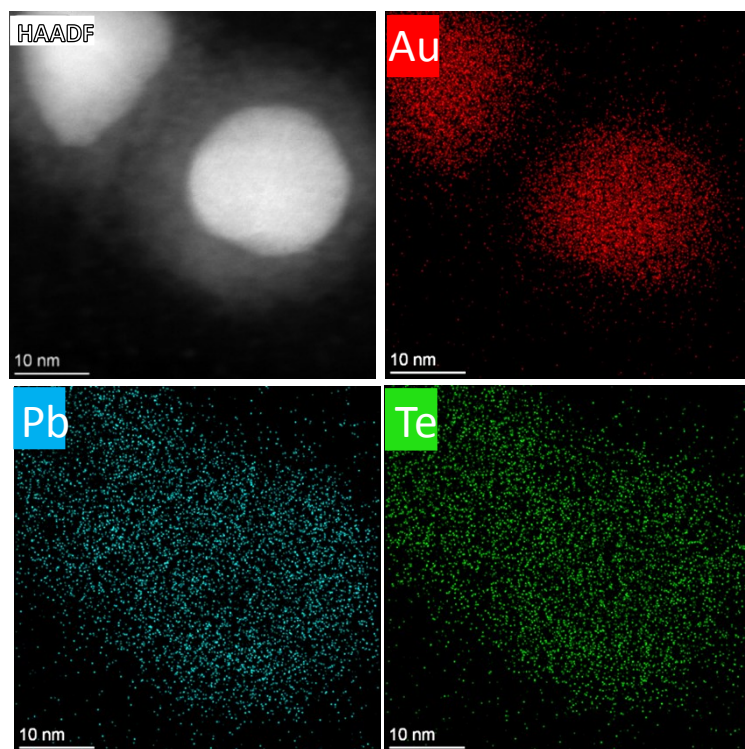

Fig. S2. Dark field STEM image, EDS STEM elemental mapping and compositional profile of Au@amorphous-PbTe core-shell HNCs.

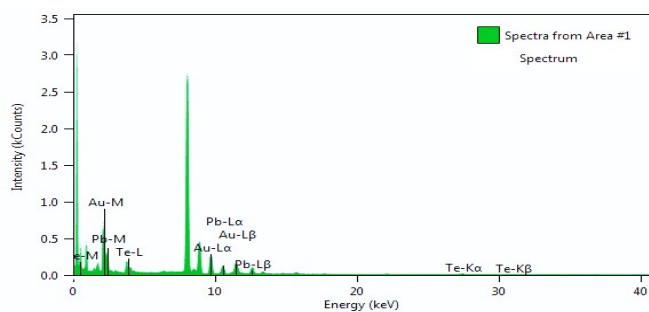

| Zaction | Element | Atomic Fraction (%) |
|---------|---------|---------------------|
| 52      | Te      | 20.51               |
| 79      | Au      | 52.57               |
| 82      | Pb      | 26.93               |

Fig. S3. Elemental analysis spectra and Element content of as-prepared Au@a-PbTe core-shell HNCs.

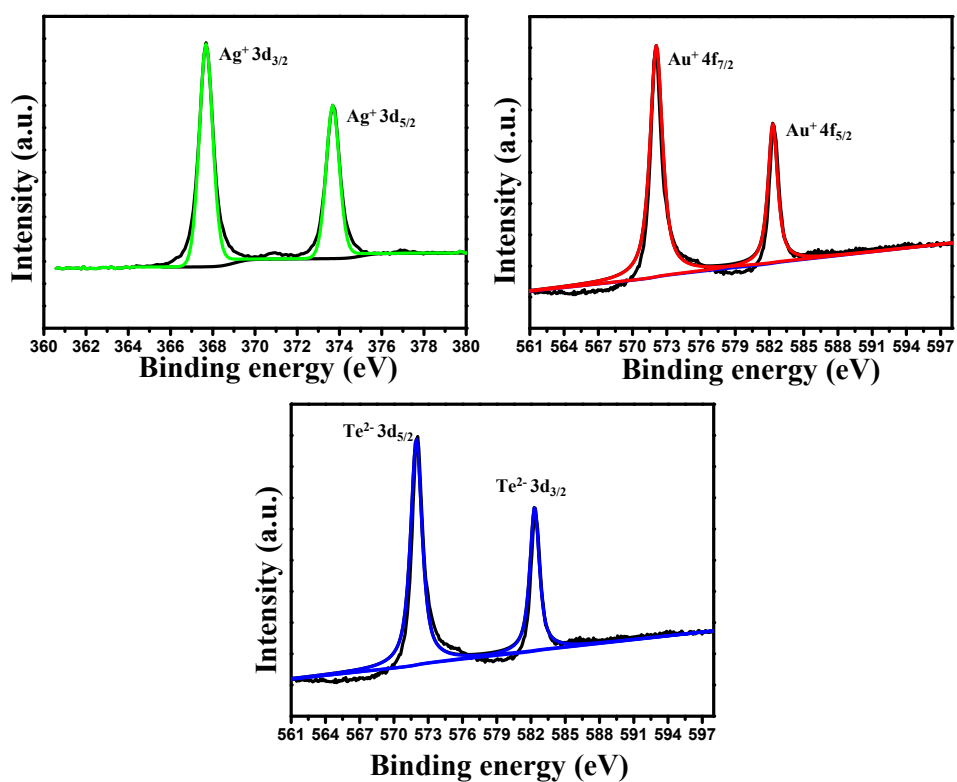

Fig. S4. XPS of as-prepared Au@Ag<sub>3</sub>AuTe<sub>2</sub> core-shell NCs.

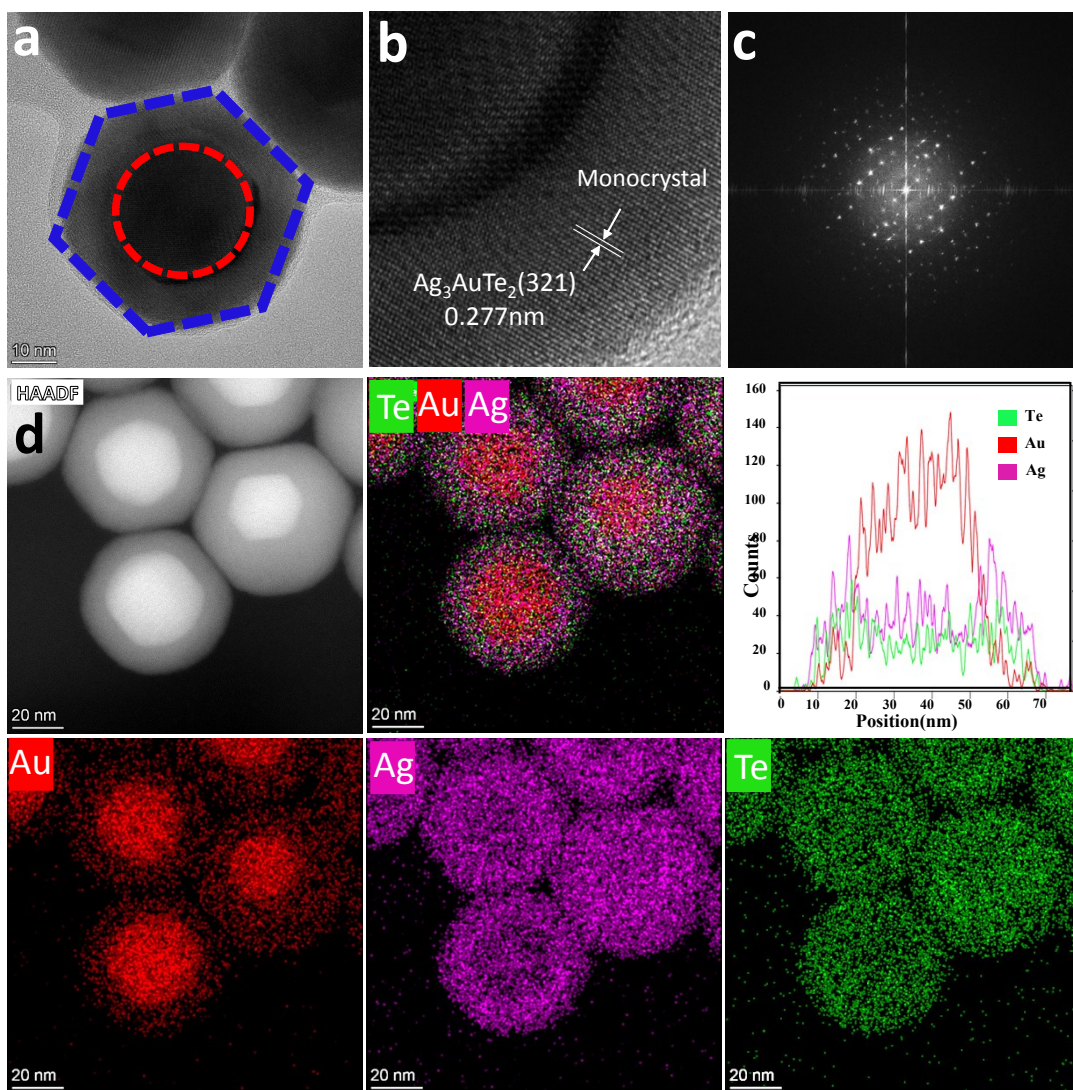

Fig. S5. HRTEM images and FFT of (a-c) Au@ Ag<sub>3</sub>AuTe<sub>2</sub> core-shell NCs. (d) Dark field STEM image, EDS STEM elemental mapping and compositional profile of Au@ Ag<sub>3</sub>AuTe<sub>2</sub> core-shell HNCs.

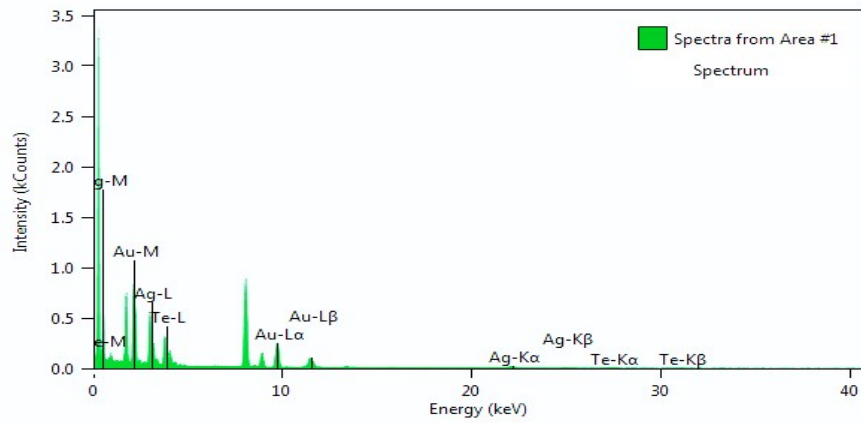

| Z  | Element | Family | Atomic Fraction (%) | Atomic Error (%) | Mass Fraction (%) | Mass Error (%) | Fit error (%) |
|----|---------|--------|---------------------|------------------|-------------------|----------------|---------------|
| 47 | Ag      | L      | 42.29               | 4.65             | 32.22             | 2.52           | 0.32          |
| 52 | Te      | L      | 25.57               | 3.77             | 23.05             | 2.90           | 0.28          |
| 79 | Au      | L      | 32.14               | 4.75             | 44.73             | 5.63           | 0.19          |

Fig. S6. Elemental analysis spectra and Element content of as-prepared Au@Ag<sub>3</sub>AuTe<sub>2</sub> core-shell HNCs.



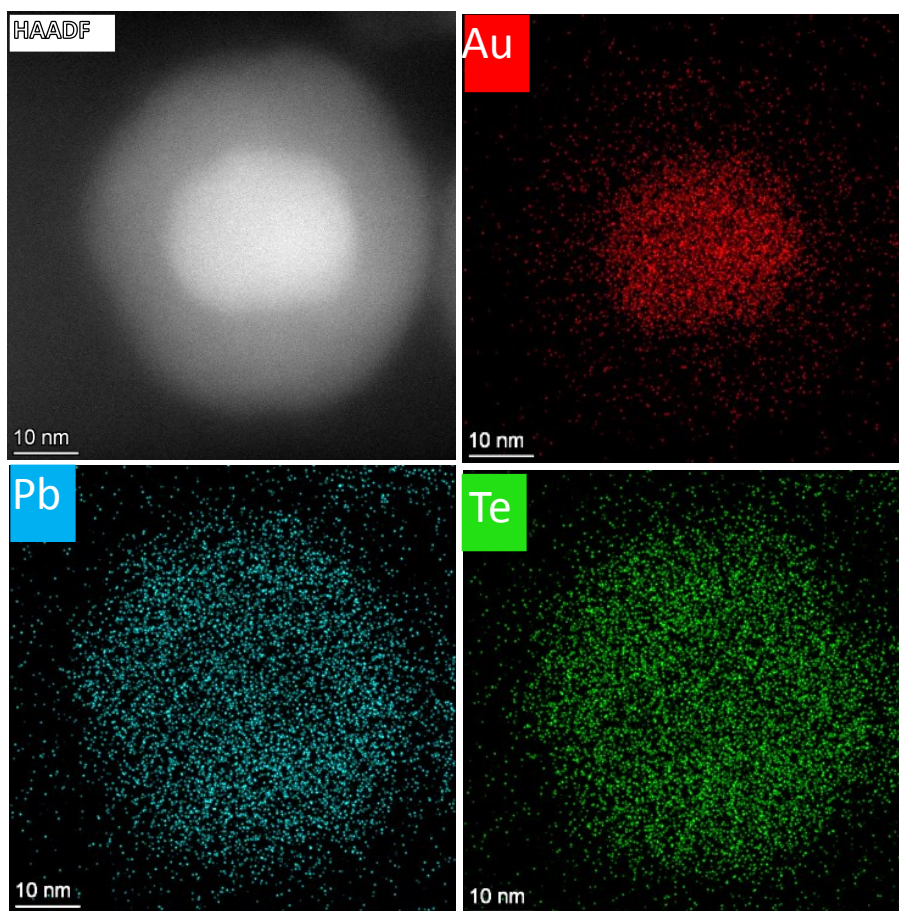

Fig. S7. Dark field STEM image, EDS STEM elemental mapping and compositional profile of Au@polycrystal-PbTe core-shell NCs.

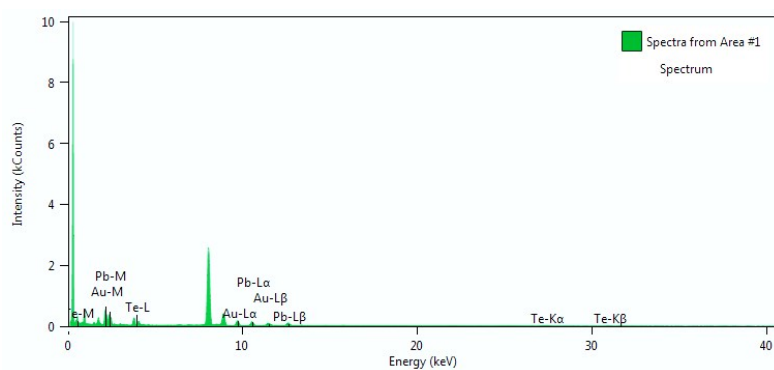

| Zaction | Element | Atomic Fraction (%) |
|---------|---------|---------------------|
| 52      | Te      | 35.16               |
| 79      | Au      | 34.03               |
| 82      | Pb      | 30.80               |

Fig. S8. Elemental analysis spectra and Element content of as-prepared Au@p-PbTe core-shell HNCs.

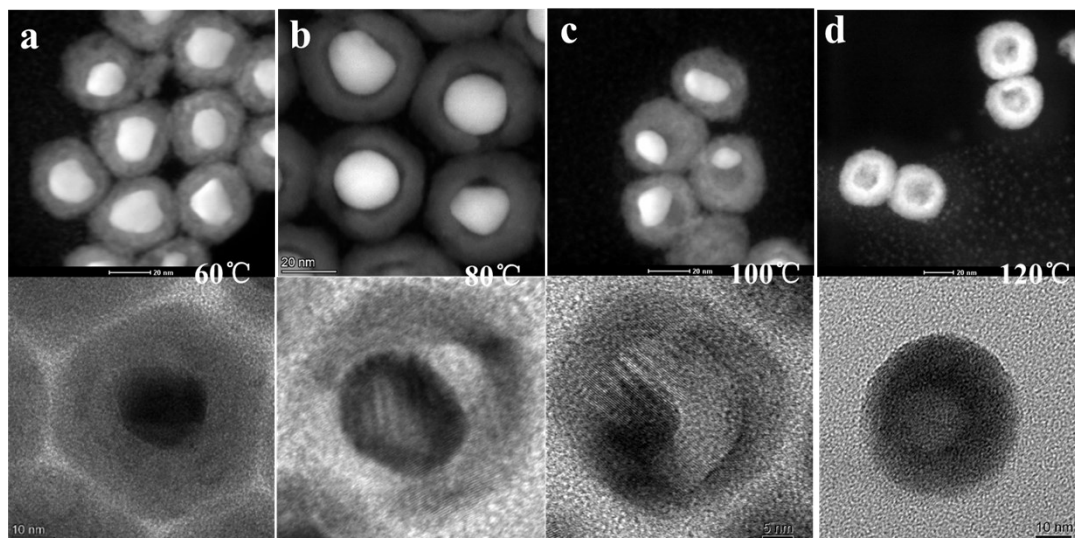

Fig. S9. Dark field STEM image and HRTEM of (a) Au@p-PbTe C-S NCs (60°C). (b) Au@p-PbTe Y-S NCs (80°C) (c) Au@p-PbTe Y-S NCs (100°C) (d) Hollow p-PbTe NCs (120°C).



## Calculation of SERS enhancement factor (EF) of Au@p-PbTe NCs

Enhancement factor (EF) for Au@p-PbTe NCs was calculated according to the following equation:

$$EF = (I_1/N_1) / (I_2/N_2) \quad (1)$$

Where  $I_1$  and  $N_1$  denote the vibration peaks and number of 4-MBA molecules on Au@p-PbTe NCs substrate, respectively.  $I_2$  and  $N_2$  denote the vibration peaks and number of 4-MBA molecules.

During the experiment, 200  $\mu\text{L}$  of 4-MBA solution (0.001 M) was dropped onto the Si wafer ( $0.5 \times 0.5 \text{ cm}^2$ ).  $N_2$  was estimated by:

$$N_2 = 200 \mu\text{L} \times 0.0001 \text{ mol/L} \times 6.02 \times 10^{23} \text{ mol}^{-1} \times S_1 / S_2 \quad (2)$$

Where Laser spot size  $S_1$  is estimated by  $S_1 = \pi r^2$ ,  $r = (1.22 \lambda / N_A) / 2$ ,  $\lambda$  is incident wavelength 514.5 nm, the numerical aperture of the objective lens  $N_A = 0.5$ .

Moreover,  $N_1$  is determined by the laser spot illuminating the 4-MBA-Au@p-PbTe NCs substrate and the density of 4-MBA molecule. Since the Au@p-PbTe NCs is as thin as an ideal flat surface,  $N_1$  can be estimated as:

$$N_1 = \sigma \times S_1 \times 6.02 \times 10^{23} \text{ mol}^{-1} \quad (3)$$

Where  $\sigma$  is the density of 4-MBA molecule adsorbed onto Au@p-PbTe NCs substrate, which is estimated to  $\sim 0.5 \text{ nM cm}^{-2}$  (3).

By substituting these values into Eq. (1), EF was calculated to be  $1.62 \times 10^8$ .

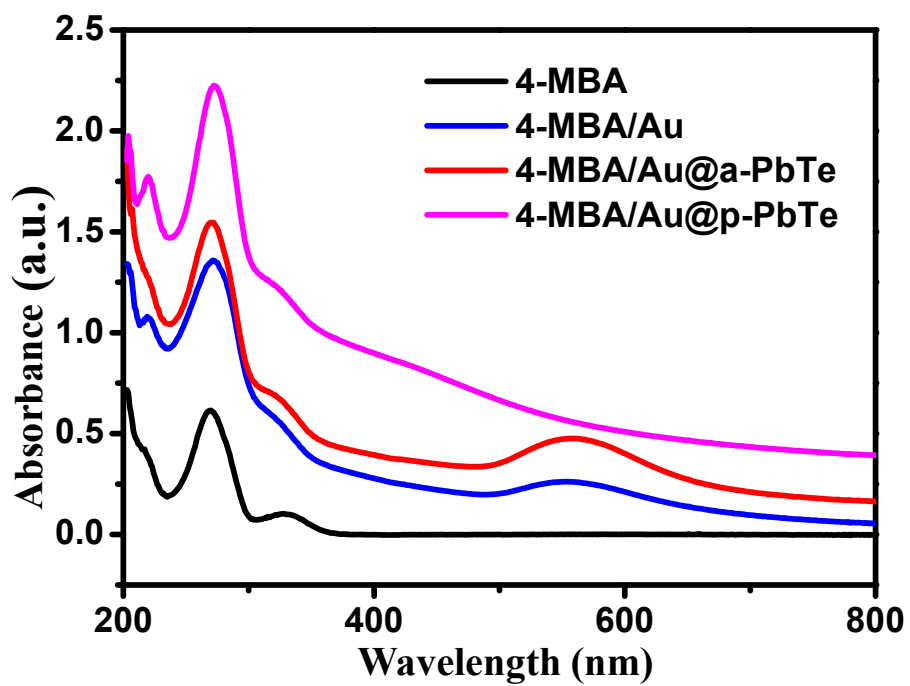

Fig. S10. UV-Vis spectra of 4-MBA, 4-MBA/Au, 4-MBA/Au@a-PbTe, 4-MBA/Au@p-PbTe.
